# Supplementary material for: Isolation and Characterization of Pluripotent Human Spermatogonial Stem Cell-Derived Cells
Source: PubMed Central journal article supplement (PMC2729695; doi:10.1634/stemcells.2008-0439), 2009-01

**A**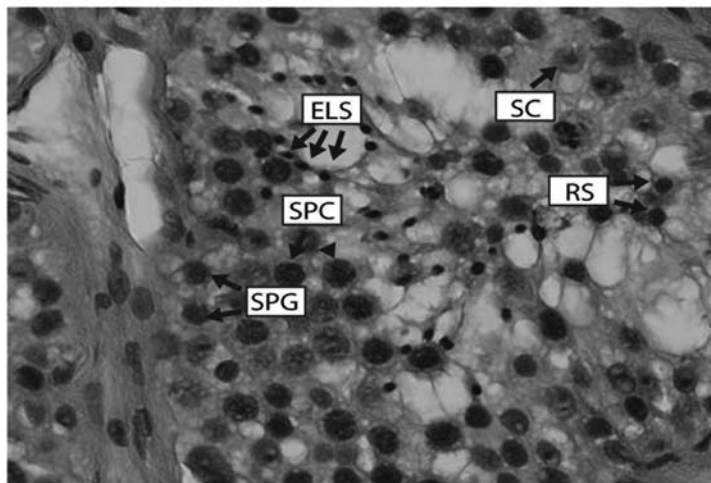**B**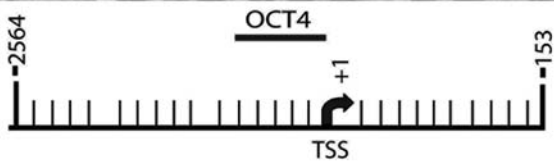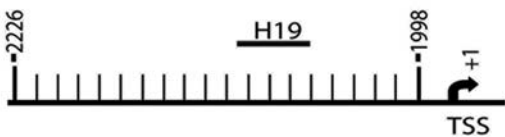**C**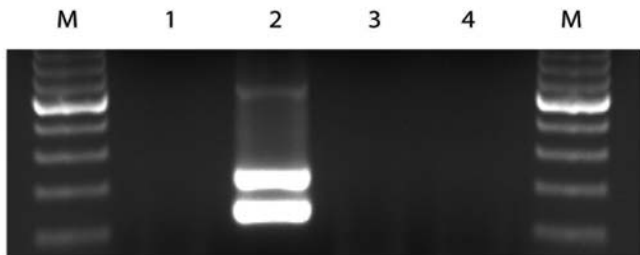

Supplement: stem0027-0138-SD1.pdf [file stem0027-0138-SD1.pdf]
